# Supplementary material
Source: publisher figshare collection journal article supplement (https://karger.figshare.com/ndownloader/files/14413460)
Supplement: Supplementary file 1 [file 14413460]

**Supplementary Methods**

**Capture-based sequencing**

RNA probes were 120-bp long with a tilting density of 2× and 50-bp flanks into the intronic regions. Pooled, barcoded libraries for next-generation sequencing (NGS) were prepared using SureSelect® QXT kits (Agilent Technologies, Santa Clara, CA, USA) according to the manufacturer’s protocol. Genomic DNA samples were prepared using QIAamp® DNA Blood midi kit (Qiagen, KJ Venlo, Netherlands) following the man. The prepared libraries were sequenced via 150-bp single-end (SE) reads and an 8-bp barcode read using an Illumina MiSeq sequencer. Original files were aligned to the UCSC human reference sequence hg 19 using the Burrows-Wheeler Aligner v.0.7.12[1], and sequence alignment map (SAM) files were generated. These files were sorted and indexed using SAMtools (v.1.2)[2]. Then files obtained in BAM format were analyzed according to Genome Analysis Toolkit (GATK v.3.7) best-practice guidelines[3]. BAM files underwent further processing to remove duplicate reads (Picard MarkDuplicates v.1.119; http://broadinstitute.github.io/picard/) and for base quality recalibration (BaseRecalibrator v.0.1.19). Detection of single nucleotide variants (SNVs), indel detection, and genotyping were performed using GATK HaplotypeCaller (v.0.1.19). Variants were annotated with the GEMINI framework[4] and ANNOVAR[5]. Depth of coverage was calculated using GATK DepthOfCoverage (v.0.1.19). Copy number variations were analyzed with CONTRA software by calling copy number gains and losses for each target region through comparison with the normalized depth of sequencing in control samples.[6]

**Sanger sequencing**

Bidirectional Sanger sequencing was performed to confirm the presence of variants identified by NGS. For variants within the homologous region of *PKD1* (exons 1–33), the pertinent regions were first amplified by long-range (LR) -PCR using the primers reported previously. [7] Exon 1 of *PKD1* was also analyzed by Sanger sequencing in patients without pathogenic mutations according to NGS. [8]

**Variant filtering**

Filtering of candidate variants was done as described previously[9]. We first excluded SNVs with allele frequencies >0.01 in any population within the Exome Aggregation Consortium[10] (ExAC: http:// exac.broadinstitute.org), National Heart, Lung, and Blood Institute (NHLBI) Exome Sequencing Project exome variant server dataset ESP6500 (http://evs.gs.washington.edu/EVS/), 1000 Genomes catalog[11] (http://browser.1000 genomes.org/index.html), Human Genetic Variation Database[12] (HGVD: http://www. genome.med.kyoto-u.ac.jp/SnpDB/), or the genome cohort study of Tohoku Medical Megabank Organization[13] (ToMMo: https://ijgvd.megabank.tohoku.ac.jp). We also excluded SNVs with “LOW” impact severities based on the definition in the GEMINI software4, which includes the following functional predictions: “synonymous_coding,” “intergenic,” “upstream,” “untranslated regions (UTR),” “intron,” etc. Missense variants of genes other than *PKD1* and *PKD2* were excluded if the depth of coverage was <20× and/or the alternative allele was found in <35% of reads. To interpret the significance of variants, we used the Polyphen2[14], SIFT[15], CADD[16], MCAP[17], and GERP conservation scores[18]. Interpretation of the significance of detected variants was based on American College of Medical Genetics and Genomics (ACMG) guidelines, Autosomal Dominant Polycystic Kidney Disease Mutation Database (PKDB, http://pkdb.mayo.edu), ClinVar (https://www.ncbi.nlm.nih.gov/clinvar/), and Human Gene Mutation Database Pro (HGMD Pro)[19].

**Supplementary References**

1 Li H, Durbin R: Fast and accurate short read alignment with Burrows-Wheeler transform. Bioinformatics (Oxford, England) 2009;25:1754-1760.

2 Li H, Handsaker B, Wysoker A, Fennell T, Ruan J, Homer N, Marth G, Abecasis G, Durbin R: The Sequence Alignment/Map format and SAMtools. Bioinformatics (Oxford, England) 2009;25:2078-2079.

3 DePristo MA, Banks E, Poplin R, Garimella KV, Maguire JR, Hartl C, Philippakis AA, del Angel G, Rivas MA, Hanna M, McKenna A, Fennell TJ, Kernytsky AM, Sivachenko AY, Cibulskis K, Gabriel SB, Altshuler D, Daly MJ: A framework for variation discovery and genotyping using next-generation DNA sequencing data. Nature genetics 2011;43:491-498.

4 Paila U, Chapman BA, Kirchner R, Quinlan AR: GEMINI: integrative exploration of genetic variation and genome annotations. PLoS computational biology 2013;9:e1003153.

5 Wang K, Li M, Hakonarson H: ANNOVAR: functional annotation of genetic variants from high-throughput sequencing data. Nucleic acids research 2010;38:e164.

6 Li J, Lupat R, Amarasinghe KC, Thompson ER, Doyle MA, Ryland GL, Tothill RW, Halgamuge SK, Campbell IG, Gorringe KL: CONTRA: copy number analysis for targeted resequencing. Bioinformatics (Oxford, England) 2012;28:1307-1313.

7 Phakdeekitcharoen B, Watnick TJ, Germino GG: Mutation analysis of the entire replicated portion of PKD1 using genomic DNA samples. Journal of the American Society of Nephrology : JASN 2001;12:955-963.

8 Fujimaru T, Mori T, Sekine A, Mandai S, Chiga M, Kikuchi H, Ando F, Mori Y, Nomura N, Iimori S, Naito S, Okado T, Rai T, Hoshino J, Ubara Y, Uchida S, Sohara E: Kidney enlargement and multiple liver cyst formation implicate mutations in PKD1/2 in adult sporadic polycystic kidney disease. Clinical genetics 2018;94:125-131.

9 Chong JX, Burrage LC, Beck AE, Marvin CT, McMillin MJ, Shively KM, Harrell TM, Buckingham KJ, Bacino CA, Jain M, Alanay Y, Berry SA, Carey JC, Gibbs RA, Lee BH, Krakow D, Shendure J, Nickerson DA, Bamshad MJ: Autosomal-Dominant Multiple Pterygium Syndrome Is Caused by Mutations in MYH3. American journal of human genetics 2015;96:841-849.

10 Lek M, Karczewski KJ, Minikel EV, Samocha KE, Banks E, Fennell T, O'Donnell-Luria AH, Ware JS, Hill AJ, Cummings BB, Tukiainen T, Birnbaum DP, Kosmicki JA, Duncan LE, Estrada K, Zhao F, Zou J, Pierce-Hoffman E, Berghout J, Cooper DN, Deflaux N, DePristo M, Do R, Flannick J, Fromer M, Gauthier L, Goldstein J, Gupta N, Howrigan D, Kiezun A, Kurki MI, Moonshine AL, Natarajan P, Orozco L, Peloso GM, Poplin R, Rivas MA, Ruano-Rubio V, Rose SA, Ruderfer DM, Shakir K, Stenson PD, Stevens C, Thomas BP, Tiao G, Tusie-Luna MT, Weisburd B, Won HH, Yu D, Altshuler DM, Ardissino D, Boehnke M, Danesh J, Donnelly S, Elosua R, Florez JC, Gabriel SB, Getz G, Glatt SJ, Hultman CM, Kathiresan S, Laakso M, McCarroll S, McCarthy MI, McGovern D, McPherson R, Neale BM, Palotie A, Purcell SM, Saleheen D, Scharf JM, Sklar P, Sullivan PF, Tuomilehto J, Tsuang MT, Watkins HC, Wilson JG, Daly MJ, MacArthur DG: Analysis of protein-coding genetic variation in 60,706 humans. Nature 2016;536:285-291.

11 Auton A, Brooks LD, Durbin RM, Garrison EP, Kang HM, Korbel JO, Marchini JL, McCarthy S, McVean GA, Abecasis GR: A global reference for human genetic variation. Nature 2015;526:68-74.

12 Higasa K, Miyake N, Yoshimura J, Okamura K, Niihori T, Saitsu H, Doi K, Shimizu M, Nakabayashi K, Aoki Y, Tsurusaki Y, Morishita S, Kawaguchi T, Migita O, Nakayama K, Nakashima M, Mitsui J, Narahara M, Hayashi K, Funayama R, Yamaguchi D, Ishiura H, Ko WY, Hata K, Nagashima T, Yamada R, Matsubara Y, Umezawa A, Tsuji S, Matsumoto N, Matsuda F: Human genetic variation database, a reference database of genetic variations in the Japanese population. Journal of human genetics 2016;61:547-553.

13 Nagasaki M, Yasuda J, Katsuoka F, Nariai N, Kojima K, Kawai Y, Yamaguchi-Kabata Y, Yokozawa J, Danjoh I, Saito S, Sato Y, Mimori T, Tsuda K, Saito R, Pan X, Nishikawa S, Ito S, Kuroki Y, Tanabe O, Fuse N, Kuriyama S, Kiyomoto H, Hozawa A, Minegishi N, Douglas Engel J, Kinoshita K, Kure S, Yaegashi N, Yamamoto M: Rare variant discovery by deep whole-genome sequencing of 1,070 Japanese individuals. Nature communications 2015;6:8018.

14 Adzhubei IA, Schmidt S, Peshkin L, Ramensky VE, Gerasimova A, Bork P, Kondrashov AS, Sunyaev SR: A method and server for predicting damaging missense mutations. Nature methods 2010;7:248-249.

15 Kumar P, Henikoff S, Ng PC: Predicting the effects of coding non-synonymous variants on protein function using the SIFT algorithm. Nature protocols 2009;4:1073-1081.

16 Kircher M, Witten DM, Jain P, O'Roak BJ, Cooper GM, Shendure J: A general framework for estimating the relative pathogenicity of human genetic variants. Nature genetics 2014;46:310-315.

17 Jagadeesh KA, Wenger AM, Berger MJ, Guturu H, Stenson PD, Cooper DN, Bernstein JA, Bejerano G: M-CAP eliminates a majority of variants of uncertain significance in clinical exomes at high sensitivity. Nature genetics 2016;48:1581-1586.

18 Davydov EV, Goode DL, Sirota M, Cooper GM, Sidow A, Batzoglou S: Identifying a high fraction of the human genome to be under selective constraint using GERP++. PLoS computational biology 2010;6:e1001025.

19 Stenson PD, Mort M, Ball EV, Evans K, Hayden M, Heywood S, Hussain M, Phillips AD, Cooper DN: The Human Gene Mutation Database: towards a comprehensive repository of inherited mutation data for medical research, genetic diagnosis and next-generation sequencing studies. Human genetics 2017;136:665-677.

**Supplementary Figure legends**

**Figure S1: Mutations in *PKD1* truncating group patients.
Figure S2: Mutations in *PKD1* non-truncating group patients.**

**Figure S3: Mutations in *PKD2* group patients.**

**Figure S4: Pathogenic mutations in Other group patients.**
